# Supplementary material for: EBV renders B cells susceptible to HIV-1 in humanized mice
Source: Life Sci Alliance. 2020 Jun 23;3(8):e202000640. doi: 10.26508/lsa.202000640 (PMC7335381; doi:10.26508/lsa.202000640)
Supplement: Supplementary file 4 [file LSA-2020-00640_TableS4.xls]

## Sheet: LCL integration sites
Analysis Type:	PANTHER Overrepresentation Test (Released 20171205)
Annotation Version and Release Date:	GO Ontology database Released 2018-02-02
Analyzed List:	LCL HIV integration Sites Donor 2, 3
Reference List:	Homo sapiens (all genes in database)
Test Type:	FISHER
GO biological process complete	Homo sapiens - REFLIST (21042)	Input (745)	expected	over/under	fold Enrichment	raw P-value	FDR
Golgi to endosome transport (GO:0006895)	20	7	0.71	+	9.89	2.59e-05	0.00309
endocytic recycling (GO:0032456)	27	7	0.96	+	7.32	0.000128	0.0113
peptidyl-tyrosine autophosphorylation (GO:0038083)	47	8	1.66	+	4.81	0.000529	0.0375
regulation of actin filament depolymerization (GO:0030834)	49	8	1.73	+	4.61	0.000676	0.0454
histone lysine methylation (GO:0034968)	68	11	2.41	+	4.57	7.55e-05	0.00746
epidermal growth factor receptor signaling pathway (GO:0007173)	59	9	2.09	+	4.31	0.000494	0.0351
regulation of protein depolymerization (GO:1901879)	74	11	2.62	+	4.2	0.000148	0.0129
Golgi organization (GO:0007030)	96	14	3.4	+	4.12	2.34e-05	0.00287
mitotic spindle organization (GO:0007052)	72	10	2.55	+	3.92	0.000477	0.0343
histone methylation (GO:0016571)	87	12	3.08	+	3.9	0.000142	0.0125
peptidyl-lysine methylation (GO:0018022)	81	11	2.87	+	3.84	0.000301	0.0242
ciliary basal body-plasma membrane docking (GO:0097711)	96	13	3.4	+	3.82	8.98e-05	0.0087
regulation of phosphatidylinositol 3-kinase signaling (GO:0014066)	97	13	3.43	+	3.79	9.87e-05	0.00911
ERBB signaling pathway (GO:0038127)	83	11	2.94	+	3.74	0.000363	0.028
microtubule cytoskeleton organization involved in mitosis (GO:1902850)	95	12	3.36	+	3.57	0.000297	0.024
cytosolic transport (GO:0016482)	130	16	4.6	+	3.48	4.14e-05	0.00465
protein ubiquitination involved in ubiquitin-dependent protein catabolic process (GO:0042787)	141	17	4.99	+	3.41	3.05e-05	0.00355
regulation of protein complex disassembly (GO:0043244)	100	12	3.54	+	3.39	0.000454	0.0333
negative regulation of chromosome organization (GO:2001251)	115	13	4.07	+	3.19	0.00045	0.0332
endosomal transport (GO:0016197)	251	27	8.89	+	3.04	1.2e-06	0.000234
protein autophosphorylation (GO:0046777)	197	21	6.97	+	3.01	2.05e-05	0.00262
covalent chromatin modification (GO:0016569)	476	50	16.85	+	2.97	7.63e-11	5.15e-08
histone modification (GO:0016570)	354	36	12.53	+	2.87	7.55e-08	2.39e-05
regulation of actin polymerization or depolymerization (GO:0008064)	168	17	5.95	+	2.86	0.000217	0.018
regulation of actin filament length (GO:0030832)	169	17	5.98	+	2.84	0.000231	0.0191
regulation of chromatin organization (GO:1902275)	164	16	5.81	+	2.76	0.000476	0.0344
regulation of chromosome organization (GO:0033044)	308	29	10.9	+	2.66	5.58e-06	0.000883
protein polyubiquitination (GO:0000209)	288	27	10.2	+	2.65	1.25e-05	0.00172
protein deubiquitination (GO:0016579)	287	25	10.16	+	2.46	9.62e-05	0.00904
chromatin organization (GO:0006325)	667	58	23.62	+	2.46	2.08e-09	1.01e-06
peptidyl-lysine modification (GO:0018205)	300	26	10.62	+	2.45	7.22e-05	0.00727
ubiquitin-dependent protein catabolic process (GO:0006511)	492	42	17.42	+	2.41	6.74e-07	0.000163
regulation of GTPase activity (GO:0043087)	481	41	17.03	+	2.41	9.65e-07	0.0002
modification-dependent macromolecule catabolic process (GO:0043632)	506	43	17.92	+	2.4	5.22e-07	0.000137
positive regulation of GTPase activity (GO:0043547)	412	35	14.59	+	2.4	7.79e-06	0.00113
regulation of small GTPase mediated signal transduction (GO:0051056)	318	27	11.26	+	2.4	6.72e-05	0.00699
modification-dependent protein catabolic process (GO:0019941)	497	42	17.6	+	2.39	8.01e-07	0.000183
cellular protein catabolic process (GO:0044257)	579	48	20.5	+	2.34	2.54e-07	7.15e-05
protein modification by small protein removal (GO:0070646)	303	25	10.73	+	2.33	0.000182	0.0153
negative regulation of organelle organization (GO:0010639)	330	27	11.68	+	2.31	0.00016	0.0137
protein catabolic process (GO:0030163)	637	52	22.55	+	2.31	9.76e-08	2.97e-05
peptidyl-amino acid modification (GO:0018193)	895	73	31.69	+	2.3	2.8e-10	1.61e-07
proteolysis involved in cellular protein catabolic process (GO:0051603)	552	45	19.54	+	2.3	8.71e-07	0.00019
endomembrane system organization (GO:0010256)	370	30	13.1	+	2.29	6.62e-05	0.00694
cellular macromolecule catabolic process (GO:0044265)	854	68	30.24	+	2.25	2.53e-09	1.19e-06
regulation of actin cytoskeleton organization (GO:0032956)	305	24	10.8	+	2.22	0.000563	0.0393
regulation of cell cycle phase transition (GO:1901987)	439	34	15.54	+	2.19	5.13e-05	0.0056
regulation of cellular component size (GO:0032535)	336	26	11.9	+	2.19	0.00037	0.0284
regulation of mitotic cell cycle phase transition (GO:1901990)	407	31	14.41	+	2.15	0.000148	0.013
regulation of cell morphogenesis (GO:0022604)	436	33	15.44	+	2.14	9.21e-05	0.00881
macromolecule catabolic process (GO:0009057)	997	75	35.3	+	2.12	4.03e-09	1.84e-06
chromosome organization (GO:0051276)	1040	78	36.82	+	2.12	1.89e-09	9.47e-07
regulation of actin filament-based process (GO:0032970)	347	26	12.29	+	2.12	0.00073	0.0488
cellular response to growth factor stimulus (GO:0071363)	470	35	16.64	+	2.1	9.01e-05	0.00868
transmembrane receptor protein tyrosine kinase signaling pathway (GO:0007169)	518	38	18.34	+	2.07	7.08e-05	0.00717
cellular response to organonitrogen compound (GO:0071417)	491	36	17.38	+	2.07	8.32e-05	0.00812
microtubule cytoskeleton organization (GO:0000226)	399	29	14.13	+	2.05	0.000619	0.0419
plasma membrane bounded cell projection assembly (GO:0120031)	415	30	14.69	+	2.04	0.000483	0.0345
cell projection assembly (GO:0030031)	420	30	14.87	+	2.02	0.000536	0.0378
enzyme linked receptor protein signaling pathway (GO:0007167)	715	51	25.31	+	2.01	6.18e-06	0.000949
protein ubiquitination (GO:0016567)	716	51	25.35	+	2.01	6.32e-06	0.000952
protein phosphorylation (GO:0006468)	969	69	34.31	+	2.01	1.55e-07	4.53e-05
protein modification by small protein conjugation or removal (GO:0070647)	1013	72	35.87	+	2.01	7.08e-08	2.34e-05
cellular response to nitrogen compound (GO:1901699)	577	41	20.43	+	2.01	6.45e-05	0.00685
mitotic cell cycle process (GO:1903047)	653	46	23.12	+	1.99	2.77e-05	0.00328
response to growth factor (GO:0070848)	497	35	17.6	+	1.99	0.000237	0.0195
mitotic cell cycle (GO:0000278)	711	50	25.17	+	1.99	1.01e-05	0.00146
organelle localization (GO:0051640)	577	40	20.43	+	1.96	0.000111	0.0101
posttranscriptional regulation of gene expression (GO:0010608)	538	37	19.05	+	1.94	0.000256	0.0209
cellular response to DNA damage stimulus (GO:0006974)	742	51	26.27	+	1.94	1.52e-05	0.00203
regulation of organelle organization (GO:0033043)	1227	84	43.44	+	1.93	2.68e-08	9.45e-06
phosphorylation (GO:0016310)	1289	88	45.64	+	1.93	1.43e-08	5.41e-06
protein modification by small protein conjugation (GO:0032446)	801	54	28.36	+	1.9	1.86e-05	0.00241
regulation of mitotic cell cycle (GO:0007346)	653	44	23.12	+	1.9	0.000111	0.0102
regulation of anatomical structure morphogenesis (GO:0022603)	980	66	34.7	+	1.9	1.84e-06	0.000335
cell cycle process (GO:0022402)	1027	69	36.36	+	1.9	9.21e-07	0.000193
positive regulation of hydrolase activity (GO:0051345)	739	49	26.16	+	1.87	5.52e-05	0.00594
microtubule-based process (GO:0007017)	590	39	20.89	+	1.87	0.000333	0.0259
regulation of cell cycle process (GO:0010564)	714	47	25.28	+	1.86	9.66e-05	0.00903
negative regulation of cellular component organization (GO:0051129)	610	40	21.6	+	1.85	0.000386	0.0292
transcription by RNA polymerase II (GO:0006366)	843	55	29.85	+	1.84	3.06e-05	0.00354
regulation of cellular response to stress (GO:0080135)	631	41	22.34	+	1.84	0.000337	0.0261
cellular response to endogenous stimulus (GO:0071495)	1113	72	39.41	+	1.83	2.19e-06	0.000382
regulation of cell adhesion (GO:0030155)	671	43	23.76	+	1.81	0.00033	0.0259
macromolecule modification (GO:0043412)	3451	219	122.18	+	1.79	6.05e-18	4.69e-14
intracellular transport (GO:0046907)	1265	80	44.79	+	1.79	1.26e-06	0.000238
organonitrogen compound catabolic process (GO:1901565)	986	62	34.91	+	1.78	2.53e-05	0.00306
regulation of cell cycle (GO:0051726)	1164	73	41.21	+	1.77	5.3e-06	0.000848
plasma membrane bounded cell projection organization (GO:0120036)	1021	64	36.15	+	1.77	2.25e-05	0.00283
positive regulation of transferase activity (GO:0051347)	690	43	24.43	+	1.76	0.000586	0.0404
positive regulation of catalytic activity (GO:0043085)	1436	89	50.84	+	1.75	7.71e-07	0.000181
cellular protein modification process (GO:0006464)	3164	196	112.02	+	1.75	7.33e-15	1.42e-11
protein modification process (GO:0036211)	3164	196	112.02	+	1.75	7.33e-15	1.26e-11
cell projection organization (GO:0030030)	1050	65	37.18	+	1.75	2.87e-05	0.00337
neuron development (GO:0048666)	744	46	26.34	+	1.75	0.000439	0.0327
organelle organization (GO:0006996)	3182	196	112.66	+	1.74	1.28e-14	1.98e-11
head development (GO:0060322)	734	45	25.99	+	1.73	0.000594	0.0405
cell cycle (GO:0007049)	1361	83	48.19	+	1.72	2.91e-06	0.000496
DNA metabolic process (GO:0006259)	789	48	27.93	+	1.72	0.000449	0.0333
cellular protein localization (GO:0034613)	1338	81	47.37	+	1.71	5.08e-06	0.00082
protein transport (GO:0015031)	1362	82	48.22	+	1.7	5.86e-06	0.000909
cellular macromolecule localization (GO:0070727)	1348	81	47.73	+	1.7	7.51e-06	0.0011
protein localization (GO:0008104)	1949	116	69.01	+	1.68	7.32e-08	2.37e-05
positive regulation of macromolecule biosynthetic process (GO:0010557)	1687	100	59.73	+	1.67	8.48e-07	0.000188
cellular catabolic process (GO:0044248)	1671	99	59.16	+	1.67	1.06e-06	0.000213
cellular localization (GO:0051641)	2127	126	75.31	+	1.67	2.76e-08	9.52e-06
peptide transport (GO:0015833)	1386	82	49.07	+	1.67	1.02e-05	0.00145
positive regulation of molecular function (GO:0044093)	1761	104	62.35	+	1.67	6.7e-07	0.000165
regulation of intracellular signal transduction (GO:1902531)	1800	106	63.73	+	1.66	6.11e-07	0.000155
intracellular signal transduction (GO:0035556)	1605	94	56.83	+	1.65	3.77e-06	0.000622
positive regulation of cellular protein metabolic process (GO:0032270)	1520	89	53.82	+	1.65	6.2e-06	0.000943
neuron differentiation (GO:0030182)	925	54	32.75	+	1.65	0.000575	0.04
establishment of protein localization (GO:0045184)	1439	84	50.95	+	1.65	1.4e-05	0.0019
cellular protein metabolic process (GO:0044267)	3752	219	132.84	+	1.65	4.2e-14	5.93e-11
amide transport (GO:0042886)	1408	82	49.85	+	1.64	2.23e-05	0.00283
establishment of localization in cell (GO:0051649)	1494	87	52.9	+	1.64	1.02e-05	0.00144
regulation of cellular component organization (GO:0051128)	2326	135	82.35	+	1.64	2.43e-08	8.75e-06
positive regulation of cellular metabolic process (GO:0031325)	3051	177	108.02	+	1.64	5.45e-11	4.45e-08
cytoskeleton organization (GO:0007010)	974	56	34.48	+	1.62	0.000584	0.0404
positive regulation of biosynthetic process (GO:0009891)	1831	105	64.83	+	1.62	2.05e-06	0.000365
positive regulation of cellular biosynthetic process (GO:0031328)	1804	103	63.87	+	1.61	3.34e-06	0.000557
positive regulation of protein metabolic process (GO:0051247)	1612	92	57.07	+	1.61	1.1e-05	0.00153
response to endogenous stimulus (GO:0009719)	1368	78	48.43	+	1.61	6.49e-05	0.00684
phosphate-containing compound metabolic process (GO:0006796)	2107	120	74.6	+	1.61	3.94e-07	0.000105
positive regulation of metabolic process (GO:0009893)	3268	186	115.7	+	1.61	6.63e-11	4.9e-08
phosphorus metabolic process (GO:0006793)	2199	125	77.86	+	1.61	2.43e-07	6.97e-05
organic substance catabolic process (GO:1901575)	1655	94	58.6	+	1.6	1.03e-05	0.00144
positive regulation of macromolecule metabolic process (GO:0010604)	3034	172	107.42	+	1.6	7.76e-10	4.15e-07
positive regulation of nucleic acid-templated transcription (GO:1903508)	1433	81	50.74	+	1.6	6.76e-05	0.00699
positive regulation of transcription, DNA-templated (GO:0045893)	1433	81	50.74	+	1.6	6.76e-05	0.00694
positive regulation of RNA biosynthetic process (GO:1902680)	1434	81	50.77	+	1.6	6.8e-05	0.00693
positive regulation of nitrogen compound metabolic process (GO:0051173)	2940	166	104.09	+	1.59	1.87e-09	9.65e-07
positive regulation of signal transduction (GO:0009967)	1510	85	53.46	+	1.59	4.14e-05	0.00462
cellular response to stress (GO:0033554)	1599	90	56.61	+	1.59	2.58e-05	0.0031
positive regulation of RNA metabolic process (GO:0051254)	1504	84	53.25	+	1.58	7.23e-05	0.00723
catabolic process (GO:0009056)	1950	108	69.04	+	1.56	7.17e-06	0.00106
regulation of protein modification process (GO:0031399)	1753	97	62.07	+	1.56	2.27e-05	0.00284
regulation of hydrolase activity (GO:0051336)	1194	66	42.27	+	1.56	0.00056	0.0393
macromolecule localization (GO:0033036)	2262	125	80.09	+	1.56	1.16e-06	0.000227
regulation of catalytic activity (GO:0050790)	2317	128	82.03	+	1.56	8.2e-07	0.000184
regulation of phosphate metabolic process (GO:0019220)	1723	95	61	+	1.56	3.54e-05	0.00403
positive regulation of gene expression (GO:0010628)	1818	100	64.37	+	1.55	2.28e-05	0.00283
regulation of signal transduction (GO:0009966)	3083	169	109.15	+	1.55	9.98e-09	3.97e-06
regulation of phosphorus metabolic process (GO:0051174)	1737	95	61.5	+	1.54	3.91e-05	0.00442
positive regulation of nucleobase-containing compound metabolic process (GO:0045935)	1744	95	61.75	+	1.54	5.23e-05	0.00567
positive regulation of cellular process (GO:0048522)	4978	270	176.25	+	1.53	4.25e-14	5.49e-11
cellular component organization (GO:0016043)	5273	286	186.69	+	1.53	4.3e-15	1.33e-11
proteolysis (GO:0006508)	1331	72	47.12	+	1.53	0.000592	0.0406
regulation of response to stress (GO:0080134)	1442	78	51.05	+	1.53	0.000317	0.0252
regulation of cellular protein metabolic process (GO:0032268)	2533	137	89.68	+	1.53	8.95e-07	0.000193
regulation of signaling (GO:0023051)	3423	185	121.19	+	1.53	4.85e-09	2.03e-06
cellular macromolecule metabolic process (GO:0044260)	6609	356	233.99	+	1.52	7.41e-20	1.15e-15
nitrogen compound transport (GO:0071705)	1672	90	59.2	+	1.52	0.00012	0.0108
regulation of phosphorylation (GO:0042325)	1490	80	52.75	+	1.52	0.000384	0.0292
regulation of cell communication (GO:0010646)	3374	181	119.46	+	1.52	1.33e-08	5.14e-06
cellular component organization or biogenesis (GO:0071840)	5498	294	194.66	+	1.51	7.25e-15	1.61e-11
positive regulation of signaling (GO:0023056)	1650	88	58.42	+	1.51	0.000192	0.016
positive regulation of cell communication (GO:0010647)	1643	87	58.17	+	1.5	0.000315	0.0252
protein metabolic process (GO:0019538)	4466	235	158.12	+	1.49	1.29e-10	8.36e-08
cellular component assembly (GO:0022607)	2343	123	82.95	+	1.48	1.6e-05	0.00211
vesicle-mediated transport (GO:0016192)	1787	93	63.27	+	1.47	0.000317	0.0251
regulation of response to stimulus (GO:0048583)	4078	212	144.38	+	1.47	5.12e-09	2.09e-06
positive regulation of biological process (GO:0048518)	5607	290	198.52	+	1.46	9.58e-13	9.9e-10
regulation of developmental process (GO:0050793)	2379	123	84.23	+	1.46	3.09e-05	0.00354
regulation of molecular function (GO:0065009)	3391	173	120.06	+	1.44	9.12e-07	0.000194
positive regulation of response to stimulus (GO:0048584)	2187	111	77.43	+	1.43	0.000162	0.0138
regulation of protein metabolic process (GO:0051246)	2778	140	98.36	+	1.42	2.39e-05	0.00292
cellular component biogenesis (GO:0044085)	2607	131	92.3	+	1.42	6.14e-05	0.00657
cellular response to organic substance (GO:0071310)	2150	107	76.12	+	1.41	0.000472	0.0342
cellular response to chemical stimulus (GO:0070887)	2624	129	92.9	+	1.39	0.000165	0.014
macromolecule metabolic process (GO:0043170)	7781	382	275.49	+	1.39	6.78e-15	1.75e-11
regulation of macromolecule biosynthetic process (GO:0010556)	4221	207	149.45	+	1.39	6.65e-07	0.000166
regulation of nucleobase-containing compound metabolic process (GO:0019219)	4268	209	151.11	+	1.38	7.24e-07	0.000173
nucleic acid metabolic process (GO:0090304)	4003	196	141.73	+	1.38	1.71e-06	0.000315
nucleobase-containing compound biosynthetic process (GO:0034654)	2967	145	105.05	+	1.38	7.72e-05	0.00758
regulation of cellular metabolic process (GO:0031323)	6187	302	219.05	+	1.38	2.19e-10	1.36e-07
regulation of RNA metabolic process (GO:0051252)	3909	190	138.4	+	1.37	4.41e-06	0.000721
regulation of cellular macromolecule biosynthetic process (GO:2000112)	4119	200	145.83	+	1.37	2.71e-06	0.000466
RNA biosynthetic process (GO:0032774)	2620	127	92.76	+	1.37	0.000387	0.0292
heterocycle biosynthetic process (GO:0018130)	3035	147	107.46	+	1.37	0.000111	0.0101
regulation of cellular biosynthetic process (GO:0031326)	4400	213	155.78	+	1.37	1.21e-06	0.000232
aromatic compound biosynthetic process (GO:0019438)	3040	147	107.63	+	1.37	0.000113	0.0102
regulation of biosynthetic process (GO:0009889)	4468	216	158.19	+	1.37	1.1e-06	0.000219
transcription, DNA-templated (GO:0006351)	2610	126	92.41	+	1.36	0.00047	0.0343
nucleic acid-templated transcription (GO:0097659)	2611	126	92.44	+	1.36	0.000471	0.0343
regulation of macromolecule metabolic process (GO:0060255)	6151	294	217.78	+	1.35	4.58e-09	2.03e-06
nucleobase-containing compound metabolic process (GO:0006139)	4564	218	161.59	+	1.35	2.1e-06	0.00037
cellular aromatic compound metabolic process (GO:0006725)	4776	228	169.1	+	1.35	1.02e-06	0.000207
organonitrogen compound metabolic process (GO:1901564)	5534	264	195.93	+	1.35	7.61e-08	2.36e-05
cellular metabolic process (GO:0044237)	9069	432	321.09	+	1.35	1.41e-15	5.47e-12
regulation of nucleic acid-templated transcription (GO:1903506)	3704	176	131.14	+	1.34	5e-05	0.00554
regulation of nitrogen compound metabolic process (GO:0051171)	5958	283	210.95	+	1.34	2.33e-08	8.59e-06
RNA metabolic process (GO:0016070)	3476	165	123.07	+	1.34	9.36e-05	0.00891
heterocycle metabolic process (GO:0046483)	4740	225	167.82	+	1.34	1.88e-06	0.000338
regulation of RNA biosynthetic process (GO:2001141)	3712	176	131.42	+	1.34	5.11e-05	0.00562
negative regulation of cellular process (GO:0048523)	4454	211	157.7	+	1.34	6.41e-06	0.000956
regulation of transcription, DNA-templated (GO:0006355)	3680	174	130.29	+	1.34	7.26e-05	0.00721
regulation of metabolic process (GO:0019222)	6672	314	236.22	+	1.33	4.8e-09	2.07e-06
regulation of primary metabolic process (GO:0080090)	6124	287	216.82	+	1.32	6.12e-08	2.06e-05
organic cyclic compound biosynthetic process (GO:1901362)	3173	148	112.34	+	1.32	0.000601	0.0409
localization (GO:0051179)	5436	253	192.46	+	1.31	1.51e-06	0.000282
nitrogen compound metabolic process (GO:0006807)	8640	402	305.9	+	1.31	3.51e-12	3.41e-09
cellular macromolecule biosynthetic process (GO:0034645)	3697	172	130.89	+	1.31	0.000169	0.0142
macromolecule biosynthetic process (GO:0009059)	3762	175	133.2	+	1.31	0.000153	0.0132
regulation of gene expression (GO:0010468)	4625	215	163.75	+	1.31	1.6e-05	0.00212
cellular nitrogen compound biosynthetic process (GO:0044271)	3488	162	123.49	+	1.31	0.000318	0.025
negative regulation of biological process (GO:0048519)	4952	228	175.33	+	1.3	1.4e-05	0.00189
gene expression (GO:0010467)	3782	174	133.9	+	1.3	0.00028	0.0227
organic cyclic compound metabolic process (GO:1901360)	4997	229	176.92	+	1.29	1.82e-05	0.00238
transport (GO:0006810)	4324	197	153.09	+	1.29	0.000159	0.0137
cellular response to stimulus (GO:0051716)	6423	292	227.41	+	1.28	7.95e-07	0.000184
primary metabolic process (GO:0044238)	9162	415	324.38	+	1.28	6.8e-11	4.79e-08
organic substance metabolic process (GO:0071704)	9520	429	337.06	+	1.27	3.72e-11	3.21e-08
establishment of localization (GO:0051234)	4440	199	157.2	+	1.27	0.000373	0.0285
metabolic process (GO:0008152)	9969	446	352.96	+	1.26	1.98e-11	1.81e-08
cellular nitrogen compound metabolic process (GO:0034641)	5191	231	183.79	+	1.26	0.000121	0.0108
regulation of cellular process (GO:0050794)	10764	472	381.1	+	1.24	5.52e-11	4.28e-08
regulation of biological process (GO:0050789)	11425	490	404.51	+	1.21	4.43e-10	2.45e-07
biological regulation (GO:0065007)	12072	513	427.41	+	1.2	2.53e-10	1.51e-07
response to stimulus (GO:0050896)	8142	342	288.27	+	1.19	9.41e-05	0.0089
cellular process (GO:0009987)	15084	629	534.05	+	1.18	1.2e-15	6.2e-12
biological_process (GO:0008150)	17500	688	619.59	+	1.11	6.4e-13	7.64e-10
G-protein coupled receptor signaling pathway (GO:0007186)	1306	24	46.24	-	0.52	0.000427	0.032
Unclassified (UNCLASSIFIED)	3542	57	125.41	-	0.45	6.4e-13	7.09e-10
detection of stimulus (GO:0051606)	675	7	23.9	-	0.29	9.77e-05	0.00907
detection of chemical stimulus (GO:0009593)	507	2	17.95	-	0.11	5.69e-06	0.000892
sensory perception of smell (GO:0007608)	458	1	16.22	-	0.06	3.14e-06	0.00053
detection of stimulus involved in sensory perception (GO:0050906)	524	1	18.55	-	0.05	3.16e-07	8.74e-05
sensory perception of chemical stimulus (GO:0007606)	533	1	18.87	-	0.05	3.44e-07	9.36e-05
detection of chemical stimulus involved in sensory perception of smell (GO:0050911)	429	0	15.19	-	< 0.01	5.6e-07	0.000145
detection of chemical stimulus involved in sensory perception (GO:0050907)	472	0	16.71	-	< 0.01	1.13e-07	3.37e-05
keratinization (GO:0031424)	227	0	8.04	-	< 0.01	0.000673	0.0454

## Sheet: T cell integration sites
Analysis Type:	PANTHER Overrepresentation Test (Released 20171205)
Annotation Version and Release Date:	GO Ontology database Released 2018-02-02
Analyzed List:	T cell integration sites Donors 1,2,3
Reference List:	Homo sapiens (all genes in database)
Test Type:	FISHER
GO biological process complete	Homo sapiens - REFLIST (21042)	Input (154)	expected	over/under	fold Enrichment	raw P-value	FDR
choline transport (GO:0015871)	8	3	0.06	+	51.24	5.95e-05	0.0196
post-embryonic development (GO:0009791)	97	7	0.71	+	9.86	1.1e-05	0.00851
meiotic nuclear division (GO:0140013)	153	7	1.12	+	6.25	0.000172	0.0398
meiotic cell cycle process (GO:1903046)	164	7	1.2	+	5.83	0.000258	0.0495
lymphocyte differentiation (GO:0030098)	217	9	1.59	+	5.67	4.22e-05	0.0172
protein polyubiquitination (GO:0000209)	288	11	2.11	+	5.22	1.23e-05	0.00869
meiotic cell cycle (GO:0051321)	216	8	1.58	+	5.06	0.000239	0.0475
proteasome-mediated ubiquitin-dependent protein catabolic process (GO:0043161)	294	10	2.15	+	4.65	7.91e-05	0.0227
leukocyte differentiation (GO:0002521)	303	10	2.22	+	4.51	0.000101	0.026
lymphocyte activation (GO:0046649)	348	11	2.55	+	4.32	6.56e-05	0.0208
proteasomal protein catabolic process (GO:0010498)	319	10	2.33	+	4.28	0.000151	0.0366
covalent chromatin modification (GO:0016569)	476	13	3.48	+	3.73	6.09e-05	0.0197
regulation of mitotic cell cycle phase transition (GO:1901990)	407	11	2.98	+	3.69	0.000248	0.0487
hemopoiesis (GO:0030097)	520	14	3.81	+	3.68	3.66e-05	0.0172
hematopoietic or lymphoid organ development (GO:0048534)	566	15	4.14	+	3.62	2.28e-05	0.0122
ubiquitin-dependent protein catabolic process (GO:0006511)	492	13	3.6	+	3.61	8.43e-05	0.0233
modification-dependent protein catabolic process (GO:0019941)	497	13	3.64	+	3.57	9.3e-05	0.0253
modification-dependent macromolecule catabolic process (GO:0043632)	506	13	3.7	+	3.51	0.000111	0.0277
immune system development (GO:0002520)	598	15	4.38	+	3.43	4.22e-05	0.0168
chromatin organization (GO:0006325)	667	16	4.88	+	3.28	3.91e-05	0.0173
proteolysis involved in cellular protein catabolic process (GO:0051603)	552	13	4.04	+	3.22	0.000254	0.0492
cellular response to DNA damage stimulus (GO:0006974)	742	17	5.43	+	3.13	3.89e-05	0.0177
regulation of cellular catabolic process (GO:0031329)	785	17	5.75	+	2.96	7.67e-05	0.0229
DNA metabolic process (GO:0006259)	789	17	5.77	+	2.94	8.15e-05	0.023
chromosome organization (GO:0051276)	1040	22	7.61	+	2.89	8.94e-06	0.0077
cellular macromolecule catabolic process (GO:0044265)	854	17	6.25	+	2.72	0.000206	0.0426
cell cycle process (GO:0022402)	1027	20	7.52	+	2.66	7.37e-05	0.0224
protein modification by small protein conjugation or removal (GO:0070647)	1013	19	7.41	+	2.56	0.000182	0.0415
protein complex assembly (GO:0006461)	1108	20	8.11	+	2.47	0.0002	0.0426
protein complex biogenesis (GO:0070271)	1109	20	8.12	+	2.46	0.000203	0.0425
macromolecular complex assembly (GO:0065003)	1500	27	10.98	+	2.46	1.41e-05	0.00914
negative regulation of signal transduction (GO:0009968)	1176	21	8.61	+	2.44	0.000159	0.0379
cell cycle (GO:0007049)	1361	23	9.96	+	2.31	0.000197	0.0424
cellular response to stress (GO:0033554)	1599	27	11.7	+	2.31	4.7e-05	0.017
negative regulation of response to stimulus (GO:0048585)	1477	24	10.81	+	2.22	0.000225	0.0458
macromolecular complex subunit organization (GO:0043933)	1765	28	12.92	+	2.17	0.000106	0.027
cellular component assembly (GO:0022607)	2343	36	17.15	+	2.1	1.58e-05	0.00942
macromolecule modification (GO:0043412)	3451	51	25.26	+	2.02	5.14e-07	0.00133
organelle organization (GO:0006996)	3182	47	23.29	+	2.02	1.41e-06	0.00273
negative regulation of cellular metabolic process (GO:0031324)	2516	37	18.41	+	2.01	3.06e-05	0.0148
cellular protein modification process (GO:0006464)	3164	46	23.16	+	1.99	3.96e-06	0.00439
protein modification process (GO:0036211)	3164	46	23.16	+	1.99	3.96e-06	0.0041
negative regulation of nitrogen compound metabolic process (GO:0051172)	2347	34	17.18	+	1.98	9.62e-05	0.0257
negative regulation of macromolecule metabolic process (GO:0010605)	2546	36	18.63	+	1.93	9.83e-05	0.0258
negative regulation of metabolic process (GO:0009892)	2795	39	20.46	+	1.91	6.59e-05	0.0204
cellular component biogenesis (GO:0044085)	2607	36	19.08	+	1.89	0.000187	0.0413
regulation of signal transduction (GO:0009966)	3083	42	22.56	+	1.86	5.07e-05	0.0175
regulation of cellular macromolecule biosynthetic process (GO:2000112)	4119	55	30.15	+	1.82	3.27e-06	0.00422
cellular protein metabolic process (GO:0044267)	3752	50	27.46	+	1.82	1.18e-05	0.00871
regulation of macromolecule biosynthetic process (GO:0010556)	4221	56	30.89	+	1.81	2.68e-06	0.00378
negative regulation of cellular process (GO:0048523)	4454	57	32.6	+	1.75	6.85e-06	0.00625
regulation of RNA metabolic process (GO:0051252)	3909	50	28.61	+	1.75	4.1e-05	0.0177
regulation of cell communication (GO:0010646)	3374	43	24.69	+	1.74	0.000235	0.0473
regulation of gene expression (GO:0010468)	4625	58	33.85	+	1.71	1.36e-05	0.00915
regulation of biosynthetic process (GO:0009889)	4468	56	32.7	+	1.71	1.76e-05	0.0101
regulation of transcription, DNA-templated (GO:0006355)	3680	46	26.93	+	1.71	0.00017	0.04
regulation of cellular biosynthetic process (GO:0031326)	4400	55	32.2	+	1.71	2.45e-05	0.0127
nucleic acid metabolic process (GO:0090304)	4003	50	29.3	+	1.71	7.68e-05	0.0225
regulation of nucleic acid-templated transcription (GO:1903506)	3704	46	27.11	+	1.7	0.000184	0.0414
regulation of nucleobase-containing compound metabolic process (GO:0019219)	4268	53	31.24	+	1.7	4.82e-05	0.017
regulation of RNA biosynthetic process (GO:2001141)	3712	46	27.17	+	1.69	0.00019	0.0415
regulation of macromolecule metabolic process (GO:0060255)	6151	76	45.02	+	1.69	1.76e-07	0.00137
protein metabolic process (GO:0019538)	4466	55	32.69	+	1.68	4.16e-05	0.0175
regulation of cellular metabolic process (GO:0031323)	6187	76	45.28	+	1.68	2.81e-07	0.00109
regulation of response to stimulus (GO:0048583)	4078	50	29.85	+	1.68	0.000132	0.0326
cellular macromolecule metabolic process (GO:0044260)	6609	81	48.37	+	1.67	6.73e-08	0.00104
cellular component organization (GO:0016043)	5273	64	38.59	+	1.66	9.14e-06	0.00746
negative regulation of biological process (GO:0048519)	4952	60	36.24	+	1.66	2.26e-05	0.0125
regulation of nitrogen compound metabolic process (GO:0051171)	5958	72	43.6	+	1.65	1.47e-06	0.00253
regulation of metabolic process (GO:0019222)	6672	80	48.83	+	1.64	3.15e-07	0.000977
regulation of primary metabolic process (GO:0080090)	6124	72	44.82	+	1.61	4.45e-06	0.00432
cellular component organization or biogenesis (GO:0071840)	5498	64	40.24	+	1.59	4.32e-05	0.0163
macromolecule metabolic process (GO:0043170)	7781	89	56.95	+	1.56	2.22e-07	0.00115
nitrogen compound metabolic process (GO:0006807)	8640	93	63.23	+	1.47	2.14e-06	0.00331
cellular metabolic process (GO:0044237)	9069	97	66.37	+	1.46	1.08e-06	0.00239
primary metabolic process (GO:0044238)	9162	96	67.05	+	1.43	3.91e-06	0.00467
organic substance metabolic process (GO:0071704)	9520	96	69.67	+	1.38	2.92e-05	0.0146
metabolic process (GO:0008152)	9969	100	72.96	+	1.37	1.5e-05	0.0093
regulation of cellular process (GO:0050794)	10764	104	78.78	+	1.32	4.69e-05	0.0173
regulation of biological process (GO:0050789)	11425	109	83.62	+	1.3	4.23e-05	0.0164
biological regulation (GO:0065007)	12072	113	88.35	+	1.28	5.34e-05	0.018
